# Supplementary material for: [Br 4 F 21 ] − – a unique molecular tetrahedral interhalogen ion containing a μ 4 -bridging fluorine atom surrounded by BrF 5 molecules
Source: Royal Society of Chemistry journal article supplement (doi:10.1039/d3sc06688f), 2024-01-01
Supplement: d3sc06688f1.pdf [file d3sc06688f1.pdf]

## Supporting Information

*Martin Möbs,<sup>[a]</sup> Tim Graubner,<sup>[a]</sup> Antti J. Karttunen<sup>[b]</sup> and Florian Kraus<sup>\*[a]</sup>*

[a] M. Sc. M. Möbs, M. Sc. T. Graubner, Prof. Dr. F. Kraus, Anorganische Chemie, Fluorchemie, Philipps-Universität Marburg, Hans-Meerwein-Str. 4, 35032 Marburg, Germany, E-mail: [f.kraus@uni-marburg.de](mailto:f.kraus@uni-marburg.de)

[b] Prof. Dr. A. J. Karttunen, Department of Chemistry and Materials Science, Aalto University, 00076 Espoo, Finland

### Table of contents

|                                                                                                                                          |    |
|------------------------------------------------------------------------------------------------------------------------------------------|----|
| Table of contents .....                                                                                                                  | 1  |
| Collection of currently known homo- and hetero polyhalide anions and polyhalogen cations, “mononuclear” and “oligonuclear” species ..... | 2  |
| Experimental .....                                                                                                                       | 3  |
| Single crystal X-ray structure determination .....                                                                                       | 4  |
| Raman Spectroscopy .....                                                                                                                 | 9  |
| Band assignment for the Raman spectrum of $[\text{NMe}_4][\text{Br}_4\text{F}_{21}]\cdot\text{BrF}_5$ .....                              | 10 |
| Quantum-chemical calculations on the isolated anions $[\text{F}(\text{XF}_3)_4]^-$ ( $X = \text{Cl} - \text{I}$ ) .....                  | 11 |
| XYZ coordinates for the optimized structures of $[\text{F}(\text{XF}_3)_4]^-$ anions ( $X = \text{Cl} - \text{I}$ ) .....                | 11 |
| Solid-state quantum-chemical calculations on $[\text{NMe}_4][\text{Br}_4\text{F}_{21}]\cdot\text{BrF}_5$ .....                           | 13 |
| References .....                                                                                                                         | 15 |

# Collection of currently known homo- and hetero polyhalide anions and polyhalogen cations, “mononuclear” and “oligonuclear” species

Table S1. Currently known polyhalide anions.

|    | Homopolyhalide anions                                                                                                                                                                                                                                                                                                                                                                                                                                                                                                                                                                                                                                |                                                                                                                                                                                                                                                                                                                                                                                                                                                                                                                                                                                                                                                                                                                                                                                                                                                                                                                                                                                                                                                                                                                                                                                                                                                                                                                                                                                                                                                                                                                                                                                                                                                                                                                                                                                                                                                                                        | Heteropolyhalide anions                                                                                                                                                                                                                                                                                                                                                                                                                                                                                                                                                |                |
|----|------------------------------------------------------------------------------------------------------------------------------------------------------------------------------------------------------------------------------------------------------------------------------------------------------------------------------------------------------------------------------------------------------------------------------------------------------------------------------------------------------------------------------------------------------------------------------------------------------------------------------------------------------|----------------------------------------------------------------------------------------------------------------------------------------------------------------------------------------------------------------------------------------------------------------------------------------------------------------------------------------------------------------------------------------------------------------------------------------------------------------------------------------------------------------------------------------------------------------------------------------------------------------------------------------------------------------------------------------------------------------------------------------------------------------------------------------------------------------------------------------------------------------------------------------------------------------------------------------------------------------------------------------------------------------------------------------------------------------------------------------------------------------------------------------------------------------------------------------------------------------------------------------------------------------------------------------------------------------------------------------------------------------------------------------------------------------------------------------------------------------------------------------------------------------------------------------------------------------------------------------------------------------------------------------------------------------------------------------------------------------------------------------------------------------------------------------------------------------------------------------------------------------------------------------|------------------------------------------------------------------------------------------------------------------------------------------------------------------------------------------------------------------------------------------------------------------------------------------------------------------------------------------------------------------------------------------------------------------------------------------------------------------------------------------------------------------------------------------------------------------------|----------------|
|    |                                                                                                                                                                                                                                                                                                                                                                                                                                                                                                                                                                                                                                                      |                                                                                                                                                                                                                                                                                                                                                                                                                                                                                                                                                                                                                                                                                                                                                                                                                                                                                                                                                                                                                                                                                                                                                                                                                                                                                                                                                                                                                                                                                                                                                                                                                                                                                                                                                                                                                                                                                        | “mononuclear”                                                                                                                                                                                                                                                                                                                                                                                                                                                                                                                                                          | “oligonuclear” |
| F  | [F <sub>2</sub> ] <sup>-</sup> , <sup>[1-3]</sup> [F <sub>3</sub> ] <sup>-</sup> , <sup>[4-9]</sup> [F <sub>5</sub> ] <sup>-</sup> <sup>[9,10]</sup>                                                                                                                                                                                                                                                                                                                                                                                                                                                                                                 |                                                                                                                                                                                                                                                                                                                                                                                                                                                                                                                                                                                                                                                                                                                                                                                                                                                                                                                                                                                                                                                                                                                                                                                                                                                                                                                                                                                                                                                                                                                                                                                                                                                                                                                                                                                                                                                                                        |                                                                                                                                                                                                                                                                                                                                                                                                                                                                                                                                                                        |                |
| Cl | [Cl <sub>2</sub> ] <sup>-</sup> , <sup>[1-3,11]</sup> [Cl <sub>3</sub> ] <sup>-</sup> , <sup>[12-21]</sup> [Cl <sub>5</sub> ] <sup>-</sup> , <sup>[22,23]</sup><br>[Cl <sub>7</sub> ] <sup>-</sup> , <sup>[24]</sup> [Cl <sub>6</sub> ] <sup>-</sup> , <sup>[19]</sup> [Cl <sub>11</sub> ] <sup>-</sup> , <sup>[25]</sup> [Cl <sub>13</sub> ] <sup>-</sup> , <sup>[25]</sup><br>[Cl <sub>8</sub> ] <sup>2-</sup> , <sup>[26-28]</sup> [Cl <sub>12</sub> ] <sup>2-</sup> , <sup>[25]</sup>                                                                                                                                                            | [ClF <sub>2</sub> ] <sup>-</sup> , <sup>[5,29-32]</sup> [Cl <sub>2</sub> F] <sup>-</sup> , <sup>[5]</sup><br>[ClF <sub>4</sub> ] <sup>-</sup> , <sup>[33-36]</sup><br>[ClF <sub>6</sub> ] <sup>-</sup> , <sup>[37]</sup> [ClBr <sub>6</sub> ] <sup>-</sup> , <sup>[12]</sup><br>[ClI <sub>4</sub> ] <sup>-</sup> (unsure), <sup>[12,38]</sup> [Cl(I <sub>2</sub> ) <sub>4</sub> ] <sup>-</sup> , <sup>[39-41]</sup><br>[Cl <sub>2</sub> I <sub>4</sub> ] <sup>2-</sup> , <sup>[42]</sup>                                                                                                                                                                                                                                                                                                                                                                                                                                                                                                                                                                                                                                                                                                                                                                                                                                                                                                                                                                                                                                                                                                                                                                                                                                                                                                                                                                                               | [F(ClF) <sub>3</sub> ] <sup>-</sup> , <sup>[24]</sup> [F(ClF <sub>3</sub> ) <sub>3</sub> ] <sup>-</sup> , <sup>[43]</sup>                                                                                                                                                                                                                                                                                                                                                                                                                                              |                |
| Br | [Br <sub>3</sub> ] <sup>-</sup> , <sup>[12,44-48]</sup> [Br <sub>5</sub> ] <sup>-</sup> , <sup>[44,49,46,50,47]</sup><br>[Br <sub>7</sub> ] <sup>-</sup> , <sup>[42,46,51]</sup> [Br <sub>9</sub> ] <sup>-</sup> , <sup>[46,52-55]</sup><br>[Br <sub>11</sub> ] <sup>-</sup> , <sup>[56,57]</sup><br>[Br <sub>4</sub> ] <sup>2-</sup> , <sup>[58-62]</sup> [Br <sub>6</sub> ] <sup>2-</sup> , <sup>[63]</sup><br>[Br <sub>8</sub> ] <sup>2-</sup> , <sup>[64,65,48,42,47]</sup> [Br <sub>10</sub> ] <sup>2-</sup> , <sup>[66,67]</sup><br>[Br <sub>20</sub> ] <sup>2-</sup> , <sup>[42,68]</sup> [Br <sub>24</sub> ] <sup>2-</sup> , <sup>[69]</sup> | [BrF <sub>2</sub> ] <sup>-</sup> , <sup>[32,70,71]</sup> [BrF <sub>4</sub> ] <sup>-</sup> , <sup>[72-80]</sup><br>[BrF <sub>6</sub> ] <sup>-</sup> , <sup>[81-85]</sup> [Br <sub>2</sub> Cl] <sup>-</sup> , <sup>[86]</sup> [Br(I <sub>2</sub> ) <sub>2</sub> ] <sup>-</sup><br>(unsure), <sup>[87]</sup> [BrCl <sub>2</sub> ] <sup>-</sup> , <sup>[12,88-92]</sup>                                                                                                                                                                                                                                                                                                                                                                                                                                                                                                                                                                                                                                                                                                                                                                                                                                                                                                                                                                                                                                                                                                                                                                                                                                                                                                                                                                                                                                                                                                                    | [F(BrF <sub>3</sub> ) <sub>2</sub> ] <sup>-</sup> , <sup>[93,80,94]</sup> [F(BrF <sub>3</sub> ) <sub>3</sub> ] <sup>-</sup> , <sup>[94]</sup><br>[Br <sub>4</sub> F <sub>13</sub> ] <sup>-</sup> , <sup>[95]</sup> [F(BrF <sub>3</sub> ) <sub>3</sub> ], [Cl(BrCl) <sub>6</sub> ] <sup>-</sup> , <sup>[96]</sup><br>[Cl(BrCl) <sub>5</sub> ] <sup>-</sup> , <sup>[96]</sup> [Cl(BrCl) <sub>3</sub> ] <sup>-</sup> , <sup>[96]</sup>                                                                                                                                    |                |
| I  | many <sup>[97]</sup> (I <sub>n</sub> <sup>-</sup> )<br>many (I <sub>n</sub> <sup>2-</sup> , I <sub>n</sub> <sup>3-</sup> , I <sub>n</sub> <sup>4-</sup> ) <sup>[98]</sup>                                                                                                                                                                                                                                                                                                                                                                                                                                                                            | [IF <sub>2</sub> ] <sup>-</sup> , <sup>[32,35,99,100]</sup> [IF <sub>4</sub> ] <sup>-</sup> , <sup>[35,101,102]</sup><br>[IF <sub>6</sub> ] <sup>-</sup> , <sup>[81,103-105]</sup> [IF <sub>8</sub> ] <sup>-</sup> , <sup>[106-108]</sup> [IF <sub>5</sub> ] <sup>2-</sup> , <sup>[109]</sup><br>[ICl <sub>2</sub> ] <sup>-</sup> , <sup>[41,110-115]</sup> [I <sub>2</sub> Cl] <sup>-</sup> , <sup>[86,110,116-118]</sup><br>[ICl <sub>4</sub> ] <sup>-</sup> , <sup>[119-121]</sup> [BrICl] <sup>-</sup> , <sup>[122-127]</sup> [I <sub>2</sub> Cl <sub>2</sub> Br] <sup>-</sup> , <sup>[128]</sup><br>[I <sub>2</sub> Br <sub>2</sub> Cl <sub>4</sub> ] <sup>2-</sup> , [I <sub>3</sub> BrCl <sub>4</sub> ] <sup>2-</sup> , [I <sub>4</sub> Br <sub>2</sub> Cl <sub>2</sub> ] <sup>2-</sup> ,<br>[I <sub>2</sub> Br <sub>7</sub> Cl <sub>2</sub> ] <sup>2-</sup> , [I <sub>3</sub> Br <sub>3</sub> Cl <sub>2</sub> ] <sup>2-</sup> , <sup>[129]</sup> [IBr <sup>4</sup> ] <sup>-</sup> , <sup>[47]</sup><br>[IBr <sub>2</sub> ] <sup>-</sup> , <sup>[130-134]</sup> [I <sub>2</sub> Br] <sup>-</sup> , <sup>[118,130,135-137]</sup><br>[I <sub>2</sub> Br <sub>6</sub> ] <sup>2-</sup> , <sup>[47]</sup> [I <sub>2</sub> Br <sub>2</sub> ] <sup>2-</sup> , <sup>[118]</sup> [I <sub>2</sub> Cl <sub>2</sub> ] <sup>2-</sup> , <sup>[118,138]</sup><br>[I <sub>4</sub> Cl <sub>4</sub> ] <sup>2-</sup> , <sup>[38,139]</sup> [I <sub>3</sub> Cl <sub>3</sub> ] <sup>2-</sup> , <sup>[38]</sup> [I <sub>4</sub> Cl <sub>8</sub> ] <sup>2-</sup> , <sup>[139]</sup><br>[I <sub>6</sub> Cl <sub>6</sub> ] <sup>2-</sup> , <sup>[139]</sup> [I <sub>3</sub> Br <sub>7</sub> ] <sup>2-</sup> , <sup>[134]</sup> [I <sub>2</sub> Br <sub>6</sub> ] <sup>2-</sup> ,<br>[I <sub>3</sub> Br <sub>5</sub> ] <sup>2-</sup> , [I <sub>4</sub> Br <sub>4</sub> ] <sup>2-</sup> , <sup>[140]</sup> | [F(IF <sub>5</sub> ) <sub>3</sub> ] <sup>-</sup> , <sup>[82,141]</sup> [Cl(ICl) <sub>2</sub> ] <sup>-</sup> , <sup>[121,128,139,142-144]</sup><br>[Cl(ICl) <sub>3</sub> ] <sup>-</sup> , <sup>[145,139,146]</sup> [I <sub>2</sub> Cl <sub>7</sub> ] <sup>-</sup> (unsure), <sup>[120]</sup><br>[I <sub>3</sub> Cl <sub>10</sub> ] <sup>-</sup> (unsure), <sup>[120]</sup> [Br(IBr) <sub>2</sub> ] <sup>-</sup> , <sup>[131,147]</sup><br>[Br(IBr) <sub>3</sub> ] <sup>-</sup> , <sup>[148,149]</sup> [I <sub>4</sub> Br <sub>3</sub> ] <sup>-</sup> , <sup>[147]</sup> |                |

A recent review on polyhalogeno anions is available in the literature.<sup>[146]</sup>

Table S2. Currently known polyhalogen cations.

|    | Homopolyhalogen cations                                                                                                                                                                                                                                                                                              |                                                                                                                                                                                                                                                                                                                                                                                                                                        | Heteropolyhalogen cations                                                                                                                                                                                                |                |
|----|----------------------------------------------------------------------------------------------------------------------------------------------------------------------------------------------------------------------------------------------------------------------------------------------------------------------|----------------------------------------------------------------------------------------------------------------------------------------------------------------------------------------------------------------------------------------------------------------------------------------------------------------------------------------------------------------------------------------------------------------------------------------|--------------------------------------------------------------------------------------------------------------------------------------------------------------------------------------------------------------------------|----------------|
|    |                                                                                                                                                                                                                                                                                                                      |                                                                                                                                                                                                                                                                                                                                                                                                                                        | “mononuclear”                                                                                                                                                                                                            | “oligonuclear” |
| F  |                                                                                                                                                                                                                                                                                                                      |                                                                                                                                                                                                                                                                                                                                                                                                                                        |                                                                                                                                                                                                                          |                |
| Cl | [Cl <sub>2</sub> ] <sup>+</sup> , [Cl <sub>3</sub> ] <sup>+</sup> , <sup>[150-153]</sup> [Cl <sub>4</sub> ] <sup>+</sup> , <sup>[154]</sup>                                                                                                                                                                          | [ClF <sub>2</sub> ] <sup>+</sup> , <sup>[155-158]</sup> [Cl <sub>2</sub> F] <sup>+</sup> , <sup>[152,159,160]</sup><br>[ClF <sub>4</sub> ] <sup>+</sup> , <sup>[161,162]</sup> [ClF <sub>6</sub> ] <sup>+</sup> , <sup>[163,164]</sup>                                                                                                                                                                                                 |                                                                                                                                                                                                                          |                |
| Br | [Br <sub>2</sub> ] <sup>+</sup> , [Br <sub>3</sub> ] <sup>+</sup> , <sup>[165-167]</sup> [Br <sub>5</sub> ] <sup>+</sup> , <sup>[167,168]</sup>                                                                                                                                                                      | [BrF <sub>2</sub> ] <sup>+</sup> , <sup>[169,170]</sup> [BrF <sub>4</sub> ] <sup>+</sup> , <sup>[171,172]</sup> [BrF <sub>6</sub> ] <sup>+</sup> , <sup>[173]</sup>                                                                                                                                                                                                                                                                    | [Br <sub>2</sub> F <sub>5</sub> ] <sup>+</sup> , <sup>[174]</sup> [Br <sub>3</sub> F <sub>8</sub> ] <sup>+</sup> , <sup>[174]</sup>                                                                                      |                |
| I  | [I <sub>2</sub> ] <sup>+</sup> , [I <sub>3</sub> ] <sup>+</sup> , <sup>[166,175,176]</sup> [I <sub>5</sub> ] <sup>+</sup> , <sup>[176]</sup> [I <sub>7</sub> ] <sup>+</sup><br>(unsure), <sup>[177]</sup> [I <sub>4</sub> ] <sup>2+</sup> , <sup>[178,179]</sup> [I <sub>13</sub> ] <sup>3+</sup> , <sup>[180]</sup> | [IF <sub>2</sub> ] <sup>+</sup> , <sup>[181]</sup> [ICl <sub>2</sub> ] <sup>+</sup> , <sup>[182,183]</sup> [IBrCl] <sup>+</sup> , <sup>[184]</sup><br>[IBr <sub>2</sub> ] <sup>+</sup> , <sup>[185]</sup> [I <sub>2</sub> Cl] <sup>+</sup> (unsure), <sup>[184,186]</sup><br>[I <sub>2</sub> Br] <sup>+</sup> , <sup>[187]</sup> [IF <sub>4</sub> ] <sup>+</sup> , <sup>[171]</sup> [IF <sub>6</sub> ] <sup>+</sup> , <sup>[188]</sup> | [I <sub>4</sub> Cl <sub>3</sub> ] <sup>+</sup> (unsure), <sup>[186]</sup> [I <sub>3</sub> Cl <sub>4</sub> ] <sup>+</sup> (unsure), <sup>[186]</sup><br>[I <sub>3</sub> Cl <sub>2</sub> ] <sup>+</sup> , <sup>[186]</sup> |                |

## Experimental

All operations were performed on a stainless steel (316L) Schlenk line, which was passivated with fluorine and  $\text{ClF}_3$  at various temperatures and pressures before use. Reaction vessels were made out of fluoropolymer (perfluoroalkoxy alkanes, PFA or perfluorinated ethylene propylene copolymer, FEP) and sealed with either a PFA needle valve (Swagelok). The vessels were baked out in vacuum ( $\sim 10^{-3}$  mbar) at circa 393 K for several times and passivated with diluted  $\text{F}_2$  ( $\text{F}_2/\text{Ar}$  20:80, V/V, Solvay). All solid starting materials were stored and handled in an Ar-filled (Ar 5.0, Nippon Gases) glove box (MBraun).  $\text{BrF}_5$  and  $[\text{NMe}_4][\text{BrF}_6]$  and  $[\text{NMe}_4]\text{F}$  were prepared according to literature.<sup>[84,189,190]</sup>

**Caution!**  $\text{F}_2$ ,  $\text{BrF}_5$  and the fluoridobromates(V) are highly toxic and very strong oxidizers and therefore must be handled with proper protective equipment and with appropriate emergency treatment procedures available in the event of contact. The utmost precautions must be taken when disposing of these materials and their derivatives.

Synthesis of  $[\text{NMe}_4][\text{Br}_4\text{F}_{21}]$ : 30.0 mg (0.112 mmol, 1.00 eq) of  $[\text{NMe}_4][\text{BrF}_6]$  was placed in a PFA vessel inside the glove box and an excess of  $\text{BrF}_5$  (0.30 mL, 0.74 g, 4.2 mmol, 38 eq) was distilled onto the solid cooled to  $-196$  °C. The reaction mixture was allowed to warm up to room temperature resulting in a colorless solution. Cooling the solution to  $-36$  °C resulted in the formation of colorless cube-shaped crystals of the title compound.

Reaction of  $[\text{NMe}_4]\text{F}$  with neat  $\text{BrF}_5$ : 55.0 mg (0.590 mmol, 1.00 eq) of  $\text{NMe}_4\text{F}$  was placed in a PFA vessel inside the glove box, sealed with a PFA needle valve, and connected to a Schlenk line. The solid was cooled to  $-196$  °C and  $\text{BrF}_5$  vapor was allowed to enter the evacuated vessel via the Schlenk line. Immediately thereafter, an explosion occurred with a sharp bang (see Figure S 1).

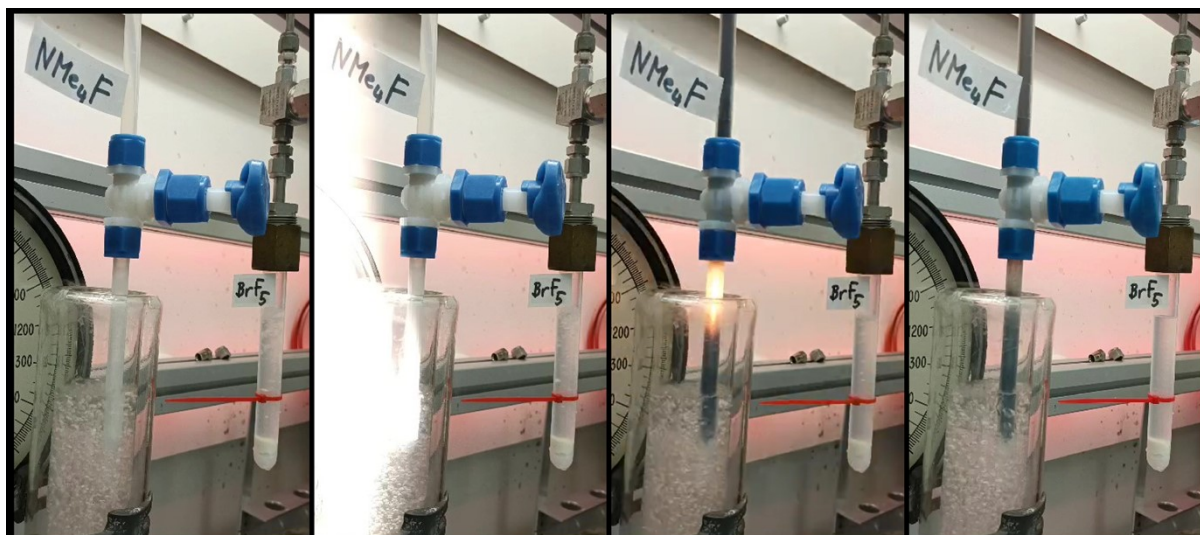

Figure S1. Four consecutive frames of a video of the reaction of  $[\text{NMe}_4]\text{F}$  with  $\text{BrF}_5$ . The right vessel contains  $[\text{NMe}_4]\text{F}$  and is cooled in a Weinhold vessel filled with liquid nitrogen. On the right side is the vessel containing  $\text{BrF}_5$ , which is connected to the left vessel via the Schlenk line. As soon as  $\text{BrF}_5$  starts to condense in the left reaction vessel, it starts reacting. A bright flash (second frame) followed by an orange-yellow flame shooting upwards through the vessel (third frame) can be seen. After the reaction, the vessel is still intact and only covered by a dense layer of soot (fourth frame) that can be wiped off again.

## Single crystal X-ray structure determination

Single-crystal X-ray diffraction of  $[\text{NMe}_4][\text{Br}_4\text{F}_{21}]\cdot\text{BrF}_5$ : Crystals of  $[\text{NMe}_4][\text{Br}_4\text{F}_{21}]\cdot\text{BrF}_5$  were selected in the absence of air under dried, cooled perfluoropolyether (Galden LS/230, Solvay, stored over molecular sieves  $3 \text{ \AA}$ ) and mounted on a MiTeGen loop. Intensity data of a suitable crystal were recorded with a D8 Quest diffractometer (Bruker). The diffractometer was operated with monochromatized  $\text{Mo-K}_\alpha$  radiation ( $0.71073 \text{ \AA}$ ) using multi-layered optics and equipped with a PHOTON III C14 detector. Evaluation, integration and reduction of the diffraction data was carried out with the APEX3 software suite.<sup>[191]</sup> The diffraction data was corrected for absorption utilizing the numerical absorption correction method of SADABS within the APEX3 software suite. The structure was solved with dual-space methods (SHELXT) in space group  $P2_13$  (No. 198),<sup>[192]</sup> and refined against  $F^2$  using the SHELXL program within the ShelXle suite as a merohedral twin by introducing the following twin instruction: TWIN 0 -1 0 -1 0 0 0 0 1.<sup>[193,194]</sup>

Because of the  $\text{BrF}_5$  moieties as well as the  $[\text{NMe}_4]^+$  ion located at  $4a$  positions with  $.3.$  symmetry, those are affected by disorder. Alternatively, a structural model in the orthorhombic subgroup  $P2_12_12_1$  (No. 19), without threefold rotation axis, was considered. For this purpose, the detwinned data were first extracted from the fcf-file created with the LIST 8 option of SHELXL using the HKLF5Tools program,<sup>[195]</sup> which allowed to introduce the additional threefold twin instruction (TWIN 0 0 1 1 0 0 0 1 0 3) for the following refinement in space group  $P2_12_12_1$ . However, a stable refinement in space group  $P2_12_12_1$  was only possible with

hard constraints such as rigid bonds or fixed atomic positions and fixed batch scale factors, and still resulted in ill-behaved or non-positive atomic displacement parameters, strong correlations between atom coordinates, and therefore worse  $R$ -values than for the refinement in space group  $P2_13$ , which therefore is the superior choice. The description of the structure as disordered is also reasonable because the recorded reflection intensities decrease sharply at higher diffraction angles, which would not be expected if the structure were merely twinned by classical pseudo-merohedry.

Representations of the crystal structures were created with the Diamond software.<sup>[196]</sup> Non-hydrogen atoms were refined with anisotropic displacement parameters. Anisotropic displacement parameters of fluorine atoms affected by disorder were restrained to approximate isotropic behavior by introducing appropriate ISOR instructions when necessary. H atom positions of the disordered methyl groups were calculated and refined using a riding model (AFIX) with isotropic displacement parameters 1.5 times  $U_{eq}$  of the associated carbon atom. The highest residual electron density after the final refinement was  $0.45 \text{ e} \cdot \text{\AA}^{-3}$ ,  $0.89 \text{ \AA}$  distant from atom F2E. CCDC 2311055 contains the supplementary crystallographic data for this paper. These data are provided free of charge by [The Cambridge Crystallographic Data Centre](https://www.ccdc.cam.ac.uk/).

Table S3. Selected crystallographic data and details of the structure determination of  $[\text{NMe}_4][\text{Br}_4\text{F}_{21}]\cdot\text{BrF}_5$ .

| Compound                                                                              | $[\text{NMe}_4][\text{Br}_4\text{F}_{21}]\cdot\text{BrF}_5$  |
|---------------------------------------------------------------------------------------|--------------------------------------------------------------|
| Molar mass / $\text{g} \cdot \text{mol}^{-1}$                                         | 967.70                                                       |
| Space group (No.)                                                                     | $P2_13$ (198)                                                |
| $a$ / $\text{\AA}$                                                                    | 13.389(4)                                                    |
| $V$ / $\text{\AA}^3$                                                                  | 2400(2)                                                      |
| $Z$                                                                                   | 4                                                            |
| Pearson symbol                                                                        | $cP192$                                                      |
| $\rho_{\text{calc.}}$ / $\text{g} \cdot \text{cm}^{-3}$                               | 2.678                                                        |
| $\mu$ / $\text{mm}^{-1}$                                                              | 8.57                                                         |
| Color                                                                                 | colorless                                                    |
| Crystal morphology                                                                    | block                                                        |
| Crystal size / $\text{mm}^3$                                                          | $0.47 \times 0.43 \times 0.33$                               |
| $T$ / K                                                                               | 100                                                          |
| $\lambda$ / $\text{\AA}$                                                              | 0.71073                                                      |
| No. of reflections measured                                                           | 61002                                                        |
| $\theta$ range / $^\circ$                                                             | 2.151 – 33.745                                               |
| Range of Miller indices                                                               | $-20 \leq h \leq 20, -20 \leq k \leq 20, -20 \leq l \leq 20$ |
| Absorption correction                                                                 | numerical                                                    |
| $T_{\text{max}}, T_{\text{min}}$                                                      | 0.205, 0.099                                                 |
| $R_{\text{int}}, R_{\sigma}$                                                          | 0.0504, 0.0207                                               |
| Completeness of the data set                                                          | 1                                                            |
| No. of unique reflections                                                             | 3221                                                         |
| No. of parameters                                                                     | 179                                                          |
| No. of restraints                                                                     | 54*                                                          |
| $S$ (all data)                                                                        | 1.035                                                        |
| $R(F)$ ( $I \geq 2\sigma(I)$ , all data)                                              | 0.0248, 0.0273                                               |
| $wR(F^2)$ ( $I \geq 2\sigma(I)$ , all data)                                           | 0.0645, 0.0655                                               |
| BASF                                                                                  | 0.466(2)                                                     |
| $\Delta\rho_{\text{max}}, \Delta\rho_{\text{min}}$ / $\text{e} \cdot \text{\AA}^{-3}$ | 0.45, -0.52                                                  |

\*ISOR restraints on  $U_{ij}$  parameters of disordered F atoms.

Table S4. Wyckoff position, site symmetry, fractional atomic coordinates, and isotropic or equivalent isotropic displacement parameters ( $\text{\AA}^2$ ).

|     | <i>Wyck.</i> | <i>site</i> | <i>x</i>     | <i>y</i>    | <i>z</i>    | <i>Uiso*/Ueq</i> | <i>Occ. (&lt;1)</i> |
|-----|--------------|-------------|--------------|-------------|-------------|------------------|---------------------|
| Br1 | 4a           | .3.         | 0.14698 (2)  | x           | x           | 0.02843 (14)     |                     |
| Br2 | 12b          | 1           | 0.36683 (3)  | 0.36404 (3) | 0.14815 (3) | 0.02639 (9)      |                     |
| Br3 | 4a           | .3.         | 0.46870 (3)  | x           | x           | 0.04010 (19)     |                     |
| F1  | 4a           | .3.         | 0.25366 (14) | x           | x           | 0.0219 (6)       |                     |
| F1A | 12b          | 1           | 0.063 (5)    | 0.068 (7)   | 0.1003 (16) | 0.060 (6)        | 0.3333              |
| F1B | 12b          | 1           | 0.0745 (18)  | 0.2406 (15) | 0.0737 (17) | 0.095 (5)        | 0.3333              |
| F1C | 12b          | 1           | 0.2078 (15)  | 0.1291 (14) | 0.0320 (11) | 0.064 (3)        | 0.3333              |
| F1D | 12b          | 1           | 0.2104 (15)  | 0.0518 (9)  | 0.1995 (13) | 0.060 (3)        | 0.3333              |
| F1E | 12b          | 1           | 0.0635 (17)  | 0.1600 (18) | 0.2447 (14) | 0.084 (5)        | 0.3333              |
| F2A | 12b          | 1           | 0.4714 (3)   | 0.4090 (3)  | 0.0926 (4)  | 0.0652 (11)      |                     |
| F2B | 12b          | 1           | 0.4249 (4)   | 0.2464 (3)  | 0.1311 (4)  | 0.0701 (15)      |                     |
| F2C | 12b          | 1           | 0.3197 (6)   | 0.3578 (6)  | 0.0270 (4)  | 0.104 (3)        |                     |
| F2D | 12b          | 1           | 0.3326 (4)   | 0.4912 (3)  | 0.1526 (4)  | 0.0709 (15)      |                     |
| F2E | 12b          | 1           | 0.4412 (4)   | 0.3724 (7)  | 0.2583 (4)  | 0.089 (2)        |                     |
| F3A | 12b          | 1           | 0.540 (5)    | 0.558 (3)   | 0.524 (3)   | 0.059 (6)        | 0.3333              |
| F3B | 12b          | 1           | 0.5094 (14)  | 0.3800 (14) | 0.5603 (13) | 0.068 (4)        | 0.3333              |
| F3C | 12b          | 1           | 0.5874 (12)  | 0.441 (2)   | 0.4087 (16) | 0.083 (5)        | 0.3333              |
| F3D | 12b          | 1           | 0.440 (2)    | 0.5670 (15) | 0.3977 (15) | 0.073 (5)        | 0.3333              |
| F3E | 12b          | 1           | 0.3747 (13)  | 0.4948 (19) | 0.5498 (12) | 0.067 (4)        | 0.3333              |
| N1  | 4a           | .3.         | 0.7352 (3)   | x           | x           | 0.0259 (9)       |                     |
| C1  | 4a           | .3.         | 0.6707 (3)   | x           | x           | 0.0356 (16)      |                     |
| H1A | 12b          | 1           | 0.606095     | 0.660379    | 0.703476    | 0.053*           | 0.3333              |
| H1B | 12b          | 1           | 0.703476     | 0.606095    | 0.660379    | 0.053*           | 0.3333              |
| H1C | 12b          | 1           | 0.660379     | 0.703476    | 0.606095    | 0.053*           | 0.3333              |
| C2  | 12b          | 1           | 0.8380 (8)   | 0.7201 (12) | 0.7011 (12) | 0.054 (3)        | 0.5                 |
| H2A | 12b          | 1           | 0.881164     | 0.771676    | 0.730023    | 0.081*           | 0.5                 |
| H2B | 12b          | 1           | 0.840396     | 0.724519    | 0.628034    | 0.081*           | 0.5                 |
| H2C | 12b          | 1           | 0.861346     | 0.654055    | 0.722285    | 0.081*           | 0.5                 |
| C3  | 12b          | 1           | 0.8160 (9)   | 0.7917 (16) | 0.6765 (9)  | 0.062 (4)        | 0.5                 |
| H3A | 12b          | 1           | 0.854520     | 0.833795    | 0.722373    | 0.093*           | 0.5                 |
| H3B | 12b          | 1           | 0.784289     | 0.833760    | 0.625653    | 0.093*           | 0.5                 |
| H3C | 12b          | 1           | 0.860688     | 0.743697    | 0.644068    | 0.093*           | 0.5                 |

Table S5. Anisotropic displacement parameters ( $\text{\AA}^2$ ).

|     | $U^{11}$     | $U^{22}$     | $U^{33}$     | $U^{12}$      | $U^{13}$      | $U^{23}$      |
|-----|--------------|--------------|--------------|---------------|---------------|---------------|
| Br1 | 0.02843 (14) | 0.02843 (14) | 0.02843 (14) | -0.00650 (14) | -0.00650 (14) | -0.00650 (14) |
| Br2 | 0.02618 (18) | 0.02442 (17) | 0.02858 (18) | -0.00481 (13) | 0.00501 (14)  | 0.00427 (14)  |
| Br3 | 0.04010 (19) | 0.04010 (19) | 0.04010 (19) | -0.00966 (15) | -0.00966 (15) | -0.00966 (15) |
| F1  | 0.0219 (6)   | 0.0219 (6)   | 0.0219 (6)   | -0.0010 (7)   | -0.0010 (7)   | -0.0010 (7)   |
| F1A | 0.049 (12)   | 0.068 (14)   | 0.063 (11)   | -0.033 (6)    | -0.010 (16)   | -0.02 (2)     |
| F1B | 0.089 (5)    | 0.083 (9)    | 0.113 (11)   | 0.039 (7)     | -0.053 (8)    | -0.003 (8)    |
| F1C | 0.089 (5)    | 0.066 (7)    | 0.038 (5)    | -0.014 (7)    | 0.022 (6)     | -0.012 (6)    |
| F1D | 0.089 (5)    | 0.025 (4)    | 0.065 (8)    | 0.009 (6)     | -0.014 (7)    | 0.004 (5)     |
| F1E | 0.089 (5)    | 0.093 (11)   | 0.069 (9)    | -0.032 (9)    | 0.032 (7)     | -0.021 (8)    |
| F2A | 0.052 (2)    | 0.062 (3)    | 0.081 (3)    | -0.0139 (19)  | 0.036 (2)     | 0.013 (2)     |
| F2B | 0.064 (3)    | 0.0406 (19)  | 0.106 (4)    | 0.0095 (19)   | 0.040 (3)     | 0.005 (2)     |
| F2C | 0.125 (6)    | 0.131 (7)    | 0.058 (3)    | -0.012 (5)    | -0.052 (4)    | -0.002 (4)    |
| F2D | 0.082 (3)    | 0.0261 (14)  | 0.104 (4)    | 0.0013 (17)   | 0.045 (3)     | 0.008 (2)     |
| F2E | 0.072 (3)    | 0.145 (6)    | 0.049 (3)    | 0.010 (4)     | -0.021 (2)    | -0.018 (3)    |
| F3A | 0.064 (9)    | 0.052 (10)   | 0.061 (11)   | -0.026 (8)    | -0.023 (8)    | -0.012 (7)    |
| F3B | 0.065 (7)    | 0.081 (8)    | 0.059 (7)    | -0.014 (7)    | -0.019 (6)    | 0.013 (6)     |
| F3C | 0.045 (7)    | 0.113 (12)   | 0.091 (10)   | 0.001 (9)     | 0.013 (7)     | 0.012 (9)     |
| F3D | 0.087 (10)   | 0.060 (8)    | 0.072 (9)    | -0.034 (8)    | -0.004 (8)    | 0.014 (7)     |
| F3E | 0.072 (8)    | 0.084 (9)    | 0.045 (6)    | 0.014 (8)     | 0.010 (6)     | -0.013 (7)    |
| N1  | 0.0259 (9)   | 0.0259 (9)   | 0.0259 (9)   | 0.0012 (10)   | 0.0012 (10)   | 0.0012 (10)   |
| C1  | 0.0356 (16)  | 0.0356 (16)  | 0.0356 (16)  | -0.0034 (14)  | -0.0034 (14)  | -0.0034 (14)  |
| C2  | 0.026 (4)    | 0.071 (9)    | 0.064 (8)    | -0.015 (5)    | 0.004 (5)     | -0.015 (7)    |
| C3  | 0.029 (5)    | 0.120 (14)   | 0.037 (5)    | -0.034 (7)    | 0.002 (4)     | 0.010 (6)     |

Table S6. Selected experimentally observed and calculated equivalent atomic distances of  $[\text{NMe}_4][\text{Br}_4\text{F}_{21}]\cdot\text{BrF}_5$  in  $\text{\AA}$  (DFT-PBE0/TZVP for solid-state and DFT-PBE0/def2-TZVP for single molecule). Note that the site symmetry of the disordered anion in the crystal structure is  $C_3$ , while in the solid-state quantum-chemical calculation the point group is  $C_1$  and  $S_4$  in the molecular calculation.

|         | $d(\text{exp.}) / \text{\AA}$ | $d(\text{solid state calc.}) / \text{\AA}$ | $d(\text{single molecule calc.}) / \text{\AA}$ |
|---------|-------------------------------|--------------------------------------------|------------------------------------------------|
| Br1-F1A | 1.668(8)                      | 1.706                                      | 1.715                                          |
| Br1-F1B | 1.864(16)                     | 1.791                                      | 1.792                                          |
| Br1-F1C | 1.759(13)                     | 1.792                                      | 1.794                                          |
| Br1-F1D | 1.685(13)                     | 1.781                                      | 1.786                                          |
| Br1-F1E | 1.729(17)                     | 1.782                                      | 1.779                                          |
| Br2-F2A | 1.696(3)                      | 1.704, 1.708, 1.706                        | -                                              |
| Br2-F2B | 1.771(4)                      | 1.784, 1.785, 1.777                        | -                                              |
| Br2-F2C | 1.742(5)                      | 1.801, 1.787, 1.789                        | -                                              |
| Br2-F2D | 1.764(4)                      | 1.793, 1.781, 1.785                        | -                                              |
| Br2-F2E | 1.783(4)                      | 1.798, 1.795, 1.779                        | -                                              |
| Br1-F1  | 2.474(3)                      | 2.462                                      | 2.576                                          |
| Br2-F1  | 2.5446(14)                    | 2.456, 2.510, 2.577                        |                                                |

Table S7. Selected experimentally observed and calculated angles for the  $[\text{Br}_4\text{F}_{21}]^-$  anion in  $^\circ$ . Symmetry operations for generation of equivalent atoms: 'z, x, y. Note that the site symmetry of the disordered anion in the crystal structure is  $C_3$ , while in the solid-state quantum-chemical calculation the point group is  $C_1$  and  $S_4$  in the molecular calculation. DFT-PBE0/TZVP level of theory for solid-state and DFT-PBE0/def2-TZVP for single molecule.

|             | $\angle(\text{exp.})/^\circ$ | $\angle(\text{solid state calc.})/^\circ$ | $\angle(\text{single molecule calc.})/^\circ$ |
|-------------|------------------------------|-------------------------------------------|-----------------------------------------------|
| Br1-F1-Br2  | 111.01(7)                    | 112.06, 108.13, 109.11                    | 110.567                                       |
| Br2'-F1-Br2 | 107.89(7)                    | 106.83, 109.75, 110.95                    | 108.926                                       |
| F1A-Br1-F1  | 166.6(5)                     | 155.19                                    | 155.629                                       |
| F1A-Br1-F1E | 84.8(17)                     | 83.34                                     | 83.823                                        |
| F1A-Br1-F1B | 83.(4)                       | 84.34                                     | 83.262                                        |
| F1A-Br1-F1C | 84.2(12)                     | 83.85                                     | 83.911                                        |
| F1A-Br1-F1D | 91.(4)                       | 83.44                                     | 83.351                                        |
| F1B-Br1-F1  | 102.5(6)                     | 111.54                                    | 110.839                                       |
| F1C-Br1-F1  | 108.5(6)                     | 113.74                                    | 115.041                                       |
| F1C-Br1-F1B | 82.5(8)                      | 90.66                                     | 89.581                                        |
| F1D-Br1-F1  | 84.5(5)                      | 79.73                                     | 80.778                                        |
| F1D-Br1-F1C | 91.7(8)                      | 88.91                                     | 89.259                                        |
| F1D-Br1-F1E | 94.9(8)                      | 88.94                                     | 89.466                                        |
| F1D-Br1-F1B | 172.1(8)                     | 167.75                                    | 167.733                                       |
| F1E-Br1-F1C | 167.2(9)                     | 167.17                                    | 166.610                                       |
| F1E-Br1-F1  | 83.0(7)                      | 72.28                                     | 77.751                                        |
| F1E-Br1-F1B | 89.8(11)                     | 88.77                                     | 88.840                                        |
| F2A-Br2-F2D | 83.5(2)                      | 83.45                                     | -                                             |
| F2A-Br2-F2E | 83.1(3)                      | 84.90, 82.44, 83.23                       | -                                             |
| F2A-Br2-F1  | 160.28(18)                   | 162.14, 154.40, 154.84                    | -                                             |
| F2A-Br2-F2C | 84.7(3)                      | 84.94, 83.84, 83.13                       | -                                             |
| F2A-Br2-F2B | 84.1(2)                      | 83.59, 84.16, 83.86                       | -                                             |
| F2B-Br2-F1  | 79.43(14)                    | 78.57, 79.00, 82.58                       | -                                             |
| F2B-Br2-F2E | 85.3(3)                      | 88.71, 88.32, 88.49                       | -                                             |
| F2C-Br2-F2D | 89.0(3)                      | 90.36, 90.71, 89.36                       | -                                             |
| F2C-Br2-F2B | 89.8(4)                      | 88.43, 87.85, 89.36                       | -                                             |
| F2C-Br2-F1  | 105.9(3)                     | 95.36, 114.38, 117.74                     | -                                             |
| F2C-Br2-F2E | 167.2(3)                     | 169.69, 166.06, 166.33                    | -                                             |
| F2D-Br2-F2E | 93.3(3)                      | 90.21, 90.10, 89.13                       | -                                             |
| F2D-Br2-F1  | 112.78(14)                   | 114.39, 112.93, 108.56                    | -                                             |
| F2D-Br2-F2B | 167.6(2)                     | 167.04, 167.34, 167.59                    | -                                             |
| F2E-Br2-F1  | 84.8(3)                      | 93.78, 77.96, 75.34                       | -                                             |



## Raman Spectroscopy

The Raman spectra were recorded with a Monovista CRS+ confocal Raman microscope (Spectroscopy & Imaging GmbH) using a 488 nm solid-state laser for excitation and either a 300 grooves/mm (low-resolution mode, FWHM:  $<5.50\text{ cm}^{-1}$ ) or a 1800 grooves/mm (high-resolution mode, FWHM:  $<0.443\text{ cm}^{-1}$ ) grating. Sample preparation of  $[\text{NMe}_4][\text{Br}_4\text{F}_{21}]\cdot\text{BrF}_5$ : Crystals of the compound were selected under extensive exclusion of air under dried, cooled perfluoropolyether (Galden LS/230, Solvay, stored over molecular sieves  $3\text{ \AA}$ ) using an optical microscope. For the transfer to the Raman microscope, the crystals within the oil were cooled with liquid nitrogen and quickly transferred onto the pre-cooled microscopy stage (*BCS196, Linkam*) of the Raman microscope. During the measurement, the sample chamber was flushed with a stream of nitrogen. However, air contact cannot be completely prevented when transferring the sample, which can also be seen from the fact that ice crystals form during the measurement on the object slide carrying the sample. The spectrum was recorded at a temperature of  $-60\text{ }^\circ\text{C}$  in order to avoid the increase of hydrolysis products. After the measurement, the crystals of  $[\text{NMe}_4][\text{Br}_4\text{F}_{21}]\cdot\text{BrF}_5$  suspended in perfluoropolyether were allowed to slowly warm up on the cooled sample holder and their decomposition was visually observed under the light microscope. At about  $-30\text{ }^\circ\text{C}$  the crystals began to shrink and droplets of a colorless liquid formed on the surfaces of the crystals. As the temperature further increased, the crystals began to dissolve more and more. A Raman spectrum of the remaining crystals recorded at  $5\text{ }^\circ\text{C}$  indicated that the compound was still present. At about  $22\text{ }^\circ\text{C}$ , the remaining crystals and the liquid that had formed began to react vigorously, forming a brownish liquid indicative of the formation of bromine. However, since the presence of moisture could not be completely excluded and the hydrolysis was occurring simultaneously, the decomposition temperature of  $[\text{NMe}_4][\text{Br}_4\text{F}_{21}]\cdot\text{BrF}_5$  could not be reliably determined.

## Band assignment for the Raman spectrum of $[\text{NMe}_4][\text{Br}_4\text{F}_{21}]\cdot\text{BrF}_5$

Table S8. Band assignment for the calculated Raman spectrum ( $>150\text{ cm}^{-1}$ ) of  $[\text{NMe}_4][\text{Br}_4\text{F}_{21}]\cdot\text{BrF}_5$ . The notation for band assignments is the following:  $\nu$  – stretching,  $\delta$  – deformation, s symmetric, as – asymmetric. vw – very weak, w -weak, m – medium, s -strong, vs – very strong, sh – shoulder. The band assignment is derived from visual inspection from the calculated normal modes using the visualization tool CRYSPLOT.<sup>[197,198]</sup>

| $\nu(\text{observed}) / \text{cm}^{-1}$ | $\nu(\text{calculated}) / \text{cm}^{-1}$ | Assignment                                                                                                                                  |
|-----------------------------------------|-------------------------------------------|---------------------------------------------------------------------------------------------------------------------------------------------|
| 235(vw)                                 | 233                                       | $\text{BrF}_5$ : wagging $\delta(\text{F}_{\text{eq}}-\text{Br}-\text{F}_{\text{eq}})$                                                      |
| 308(w)                                  | 306, 318, 325                             | $\text{BrF}_5$ : scissoring mode $\delta(\text{Br}-\text{F}_{\text{eq}})$                                                                   |
| 372(m)                                  | 393                                       | $\text{BrF}_5$ : umbrella mode $\delta(\text{Br}-\text{F}_{\text{eq}})$                                                                     |
| 413(w)                                  | 430                                       | $\text{BrF}_5$ : wagging $\delta(\text{F}_{\text{ap}}-\text{Br}-\text{F}_{\text{eq}})$                                                      |
| 529(s)                                  | 528, 535, 542, 560                        | $\text{BrF}_5$ : various $\text{Br}-\text{F}_{\text{eq}}$ stretching vibrations                                                             |
| 567(s)                                  | 595, 616                                  | $\text{BrF}_5$ : out of phase stretching $\nu_{\text{s}}(\text{Br}-\text{F}_{\text{eq}}) + \nu_{\text{as}}(\text{Br}-\text{F}_{\text{eq}})$ |
| 673(sh)                                 | 710                                       | $\text{BrF}_5$ : out of phase stretching $\nu_{\text{s}}(\text{Br}-\text{F}_{\text{ap}})$                                                   |
| 682(vs)                                 | 734                                       | $\text{BrF}_5$ : in phase stretching $\nu_{\text{s}}(\text{Br}-\text{F}_{\text{ap}})$                                                       |
| 751(w)                                  | 786                                       | $\text{NMe}_4$ : $\nu_{\text{s}}(\text{N}-\text{C})$                                                                                        |
| 948(w)                                  | 985                                       | $\text{NMe}_4$ : $\nu_{\text{as}}(\text{N}-\text{C})$                                                                                       |
| 1166(vw)                                | 1200                                      | $\text{NMe}_4$ : $\delta_{\text{as}}(\text{CH}_3)$                                                                                          |
| 1289(vw)                                | 1328                                      | $\text{NMe}_4$ : $\delta_{\text{as}}(\text{CH}_3)$ combined with $\delta_{\text{as}}(\text{N}-\text{C})$                                    |
| 1422(vw)                                | 1457                                      | $\text{NMe}_4$ : $\delta_{\text{s}}(\text{CH}_3)$                                                                                           |
| 1453(w)                                 | 1493                                      | $\text{NMe}_4$ : $\delta_{\text{as}}(\text{CH}_3)$                                                                                          |
| 2826(w)                                 |                                           |                                                                                                                                             |
| 2872(vw)                                |                                           |                                                                                                                                             |
| 2900(vw)                                | –                                         | $\text{NMe}_4$ : 2 <sup>nd</sup> order vibrations <sup>[199]</sup>                                                                          |
| 2929(m)                                 |                                           |                                                                                                                                             |
| 2962(w)                                 |                                           |                                                                                                                                             |
| 2988(m)                                 | 3197, 3106, 3114                          | $\text{NMe}_4$ : $\nu_{\text{s}}(\text{CH}_3)$                                                                                              |
| 3047(w)                                 | 3200, 3208, 3218, 3223,<br>3231,          | $\text{NMe}_4$ : $\nu_{\text{as}}(\text{CH}_3)$                                                                                             |

## Quantum-chemical calculations on the isolated anions $[F(XF_5)_4]^-$ ( $X = Cl - I$ )

Molecular calculations were carried out with the TURBOMOLE7.7<sup>[200,201]</sup> program suite using the PBE0 hybrid density functional method (DFT-PBE0).<sup>[202,203]</sup> We used the def2-TZVP triple- $\zeta$  valence basis set for fluorine, chlorine, bromine, and iodine atoms.<sup>[204]</sup> For the iodine atom, scalar relativistic effects were taken into account using a 28-electron effective core potential (ECP).<sup>[205]</sup> Multipole-accelerated resolution-of-the-identity approximation (MA-RIJ) was used to speed up the DFT calculations<sup>[206–208]</sup> and an  $m4$  integration grid was used for the numerical integration of the exchange correlation part. The “COnductor-like Screening MOdel” (COSMO) was applied to all structures to compensate the negative charge.<sup>[209]</sup> The structures of the complex anions were fully optimized within the constraints of their respective molecular point group symmetry. Numerical harmonic frequency calculations were performed to check if the optimized structures were true local minima on the potential energy surfaces. Intrinsic bond orbital (IBO) analyses were performed with the Turbomole module proper.<sup>[210]</sup>

### XYZ coordinates for the optimized structures of $[F(XF_5)_4]^-$ anions ( $X = Cl - I$ )

#### $[Cl_4F_{21}]^-$ in $S_4$

|    |            |            |            |
|----|------------|------------|------------|
| F  | 0.0000000  | 0.0000000  | 0.0000000  |
| Cl | 1.4691575  | -1.4586392 | -1.4873217 |
| Cl | -1.4691575 | 1.4586392  | -1.4873217 |
| Cl | -1.4586392 | -1.4691575 | 1.4873217  |
| Cl | 1.4586392  | 1.4691575  | 1.4873217  |
| F  | 2.1831973  | -2.4970614 | -2.4752505 |
| F  | 0.0343204  | -2.1245352 | -2.0375236 |
| F  | 1.4787249  | -0.4034414 | -2.8004424 |
| F  | 3.0407930  | -0.9641672 | -1.0980627 |
| F  | 1.5856654  | -2.6758668 | -0.3314059 |
| F  | -2.1831973 | 2.4970614  | -2.4752505 |
| F  | -0.0343204 | 2.1245352  | -2.0375236 |
| F  | -1.4787249 | 0.4034414  | -2.8004424 |
| F  | -3.0407930 | 0.9641672  | -1.0980627 |
| F  | -1.5856654 | 2.6758668  | -0.3314059 |
| F  | -2.4970614 | -2.1831973 | 2.4752505  |
| F  | -2.6758668 | -1.5856654 | 0.3314059  |
| F  | -0.9641672 | -3.0407930 | 1.0980627  |
| F  | -0.4034414 | -1.4787249 | 2.8004424  |
| F  | -2.1245352 | -0.0343204 | 2.0375236  |
| F  | 2.4970614  | 2.1831973  | 2.4752505  |
| F  | 2.1245352  | 0.0343204  | 2.0375236  |
| F  | 2.6758668  | 1.5856654  | 0.3314059  |
| F  | 0.9641672  | 3.0407930  | 1.0980627  |
| F  | 0.4034414  | 1.4787249  | 2.8004424  |

#### $[Br_4F_{21}]^-$ in $S_4$

|    |            |            |            |
|----|------------|------------|------------|
| F  | 0.0000000  | 0.0000000  | 0.0000000  |
| Br | 1.6742868  | -1.2960479 | -1.4669919 |
| Br | -1.6742868 | 1.2960479  | -1.4669919 |
| Br | -1.2960479 | -1.6742868 | 1.4669919  |
| Br | 1.2960479  | 1.6742868  | 1.4669919  |
| F  | 2.2306125  | -2.6181823 | -2.4066603 |
| F  | 0.1229204  | -1.6517722 | -2.2607476 |
| F  | 2.1555726  | -0.3254904 | -2.8945717 |
| F  | 3.3728472  | -1.2647918 | -0.8895561 |
| F  | 1.3226982  | -2.5565745 | -0.2521715 |
| F  | -2.2306125 | 2.6181823  | -2.4066603 |
| F  | -0.1229204 | 1.6517722  | -2.2607476 |
| F  | -2.1555726 | 0.3254904  | -2.8945717 |

|   |            |            |            |
|---|------------|------------|------------|
| F | -3.3728472 | 1.2647918  | -0.8895561 |
| F | -1.3226982 | 2.5565745  | -0.2521715 |
| F | -2.6181823 | -2.2306125 | 2.4066603  |
| F | -2.5565745 | -1.3226982 | 0.2521715  |
| F | -1.2647918 | -3.3728472 | 0.8895561  |
| F | -0.3254904 | -2.1555726 | 2.8945717  |
| F | -1.6517722 | -0.1229204 | 2.2607476  |
| F | 2.6181823  | 2.2306125  | 2.4066603  |
| F | 1.6517722  | 0.1229204  | 2.2607476  |
| F | 2.5565745  | 1.3226982  | 0.2521715  |
| F | 1.2647918  | 3.3728472  | 0.8895561  |
| F | 0.3254904  | 2.1555726  | 2.8945717  |

$[I_4F_{21}]^-$  in  $S_4$

|   |            |            |            |
|---|------------|------------|------------|
| F | 0.0000000  | 0.0000000  | 0.0000000  |
| I | 1.7209019  | -1.1989673 | -1.5837829 |
| I | -1.7209019 | 1.1989673  | -1.5837829 |
| I | -1.1989673 | -1.7209019 | 1.5837829  |
| I | 1.1989673  | 1.7209019  | 1.5837829  |
| F | 2.0783513  | -2.8187833 | -2.3796741 |
| F | -0.0289470 | -1.6234400 | -2.2042688 |
| F | 2.1220805  | -0.5891590 | -3.3410817 |
| F | 3.5832479  | -1.3028446 | -1.2040848 |
| F | 1.4244682  | -2.3550036 | -0.0964825 |
| F | -2.0783513 | 2.8187833  | -2.3796741 |
| F | 0.0289470  | 1.6234400  | -2.2042688 |
| F | -2.1220805 | 0.5891590  | -3.3410817 |
| F | -3.5832479 | 1.3028446  | -1.2040848 |
| F | -1.4244682 | 2.3550036  | -0.0964825 |
| F | -2.8187833 | -2.0783513 | 2.3796741  |
| F | -2.3550036 | -1.4244682 | 0.0964825  |
| F | -1.3028446 | -3.5832479 | 1.2040848  |
| F | -0.5891590 | -2.1220805 | 3.3410817  |
| F | -1.6234400 | 0.0289470  | 2.2042688  |
| F | 2.8187833  | 2.0783513  | 2.3796741  |
| F | 1.6234400  | -0.0289470 | 2.2042688  |
| F | 2.3550036  | 1.4244682  | 0.0964825  |
| F | 1.3028446  | 3.5832479  | 1.2040848  |
| F | 0.5891590  | 2.1220805  | 3.3410817  |

## Solid-state quantum-chemical calculations on [NMe<sub>4</sub>][Br<sub>4</sub>F<sub>21</sub>]·BrF<sub>5</sub>

Solid-state calculations on [NMe<sub>4</sub>][Br<sub>4</sub>F<sub>21</sub>]·BrF<sub>5</sub> were performed with the CRYSTAL23<sup>[211]</sup> program suite using hybrid density functional methods (DFT-PBE0)<sup>[202,203]</sup> combined with triple-valence basis sets TZVP for all atoms<sup>[212–214]</sup> (derived from molecular Karlsruhe basis sets<sup>[204]</sup>). Empirical D3 dispersion correction with zero damping<sup>[215,216]</sup> was applied for the geometry optimization and frequency calculation to take into account weak intermolecular interactions. Atomic positions and lattice parameters were fully optimized within the space group symmetry. As a starting point for the optimization the orthorhombic structure model (space group *P*2<sub>1</sub>2<sub>1</sub>2<sub>1</sub>, No. 19) was used in order to be able to consider the BrF<sub>5</sub> molecules without the issue of crystallographic disordering. The reciprocal space was sampled with a 2×2×2 Monkhorst-Pack-type *k*-point grid.<sup>[217]</sup> Tight truncation criteria (TOLINTEG 8, 8, 8, 8, 16) were applied for the evaluation of the bielectronic Coulomb and exchange series in all calculations. Default DFT integration grids and optimization convergence thresholds were used in all calculations. The optimized lattice parameters deviated by less than 2.3% from the lattice parameters determined with SCXRD. Harmonic vibrational frequencies and Raman intensities were calculated with the schemes implemented in CRYSTAL.<sup>[218–220]</sup> The harmonic frequencies confirmed the optimized structure as a true local minimum. Raman intensities were calculated for a polycrystalline powder sample, applying the same conditions as in the experimental set (*T* = 213.15 K and  $\lambda$  = 488 nm). For the simulation of the Raman spectrum, a pseudo-Voigt band profile (50:50 Lorentzian:Gaussian) with a FWHM of 8 cm<sup>-1</sup> was used. The band assignment is derived from visual inspection from the calculated normal modes using the visualization tool CRYSPLOT.<sup>[198]</sup>

In the following section, atomic positions and lattice parameters of the optimized structure are given in CIF format:

```
data_findsym-output
_audit_creation_method FINDSYM

_cell_length_a 13.2028547200
_cell_length_b 13.0867608600
_cell_length_c 13.1904647400
_cell_angle_alpha 90.0000000000
_cell_angle_beta 90.0000000000
_cell_angle_gamma 90.0000000000
_cell_volume 2279.0828245102

_symmetry_space_group_name_H-M "P 21 21 21"
_symmetry_Int_Tables_number 19
_space_group.reference_setting '019:P 2ac 2ab'
_space_group.transform_Pp_abc a,b,c;0,0,0

loop_
_space_group_symop_id
_space_group_symop_operation_xyz
1 x,y,z
2 x+1/2,-y+1/2,-z
3 -x,y+1/2,-z+1/2
4 -x+1/2,-y,z+1/2
```

```

loop_
  _atom_site_label
  _atom_site_type_symbol
  _atom_site_symmetry_multiplicity
  _atom_site_Wyckoff_label
  _atom_site_fract_x
  _atom_site_fract_y
  _atom_site_fract_z
  _atom_site_occupancy
  _atom_site_fract_symmform
C1 C 4 a 0.65818 0.66772 0.66727 1.00000 Dx,Dy,Dz
H1 H 4 a 0.64553 0.70811 0.59628 1.00000 Dx,Dy,Dz
H2 H 4 a 0.58748 0.65921 0.70856 1.00000 Dx,Dy,Dz
H3 H 4 a 0.69120 0.59308 0.65237 1.00000 Dx,Dy,Dz
C2 C 4 a 0.74859 0.67539 0.82832 1.00000 Dx,Dy,Dz
H4 H 4 a 0.78069 0.60058 0.81302 1.00000 Dx,Dy,Dz
H5 H 4 a 0.67697 0.66761 0.86798 1.00000 Dx,Dy,Dz
H6 H 4 a 0.80112 0.72089 0.87295 1.00000 Dx,Dy,Dz
C3 C 4 a 0.68662 0.83144 0.74996 1.00000 Dx,Dy,Dz
H7 H 4 a 0.61489 0.82264 0.78942 1.00000 Dx,Dy,Dz
H8 H 4 a 0.67476 0.86983 0.67780 1.00000 Dx,Dy,Dz
H9 H 4 a 0.73956 0.87471 0.79609 1.00000 Dx,Dy,Dz
C4 C 4 a 0.82779 0.73880 0.67482 1.00000 Dx,Dy,Dz
H10 H 4 a 0.85663 0.66263 0.65926 1.00000 Dx,Dy,Dz
H11 H 4 a 0.88100 0.78096 0.72187 1.00000 Dx,Dy,Dz
H12 H 4 a 0.81460 0.77971 0.60437 1.00000 Dx,Dy,Dz
Br1 Br 4 a 0.36673 0.36377 0.15553 1.00000 Dx,Dy,Dz
Br2 Br 4 a 0.35947 0.14860 0.36945 1.00000 Dx,Dy,Dz
Br3 Br 4 a 0.13042 0.36198 0.36771 1.00000 Dx,Dy,Dz
Br4 Br 4 a 0.45891 0.46880 0.47586 1.00000 Dx,Dy,Dz
Br5 Br 4 a 0.15057 0.14723 0.14174 1.00000 Dx,Dy,Dz
F1 F 4 a 0.25111 0.25276 0.25896 1.00000 Dx,Dy,Dz
F2 F 4 a 0.33513 0.37013 0.02394 1.00000 Dx,Dy,Dz
F3 F 4 a 0.41940 0.24048 0.13176 1.00000 Dx,Dy,Dz
F4 F 4 a 0.42901 0.36273 0.27640 1.00000 Dx,Dy,Dz
F5 F 4 a 0.34070 0.49650 0.16983 1.00000 Dx,Dy,Dz
F6 F 4 a 0.48205 0.40705 0.11554 1.00000 Dx,Dy,Dz
F7 F 4 a 0.49186 0.15481 0.33972 1.00000 Dx,Dy,Dz
F8 F 4 a 0.34740 0.03337 0.29585 1.00000 Dx,Dy,Dz
F9 F 4 a 0.23720 0.12357 0.42123 1.00000 Dx,Dy,Dz
F10 F 4 a 0.37508 0.24841 0.46187 1.00000 Dx,Dy,Dz
F11 F 4 a 0.39941 0.06934 0.46389 1.00000 Dx,Dy,Dz
F12 F 4 a 0.24745 0.42941 0.36983 1.00000 Dx,Dy,Dz
F13 F 4 a 0.14888 0.32940 0.49785 1.00000 Dx,Dy,Dz
F14 F 4 a 0.00099 0.32253 0.37616 1.00000 Dx,Dy,Dz
F15 F 4 a 0.10365 0.42028 0.24907 1.00000 Dx,Dy,Dz
F16 F 4 a 0.08404 0.47337 0.41636 1.00000 Dx,Dy,Dz
F17 F 4 a 0.50980 0.57187 0.53745 1.00000 Dx,Dy,Dz
F18 F 4 a 0.57929 0.46250 0.41716 1.00000 Dx,Dy,Dz
F19 F 4 a 0.50831 0.39947 0.58009 1.00000 Dx,Dy,Dz
F20 F 4 a 0.35042 0.49727 0.54889 1.00000 Dx,Dy,Dz
F21 F 4 a 0.42187 0.56149 0.38584 1.00000 Dx,Dy,Dz
F22 F 4 a 0.05332 0.12270 0.06016 1.00000 Dx,Dy,Dz
F23 F 4 a 0.05241 0.19788 0.21954 1.00000 Dx,Dy,Dz
F24 F 4 a 0.12185 0.02245 0.18988 1.00000 Dx,Dy,Dz
F25 F 4 a 0.22795 0.09262 0.04425 1.00000 Dx,Dy,Dz
F26 F 4 a 0.15538 0.26603 0.07602 1.00000 Dx,Dy,Dz
N1 N 4 a 0.73011 0.72835 0.73009 1.00000 Dx,Dy,Dz

```

```
# end of cif
```

## References

- [1] T. G. Castner, W. Känzig, *J. Phys. Chem. Solids* **1957**, *3*, 178–195.
- [2] W. F. Howard, L. Andrews, *J. Am. Chem. Soc.* **1973**, *95*, 3045–3046.
- [3] W. F. Howard, L. Andrews, *Inorg. Chem.* **1975**, *14*, 409–413.
- [4] B. S. Ault, L. Andrews, *J. Am. Chem. Soc.* **1976**, *98*, 1591–1593.
- [5] B. S. Ault, Lester. Andrews, *Inorg. Chem.* **1977**, *16*, 2024–2028.
- [6] A. A. Tuinman, A. A. Gakh, R. J. Hinde, R. N. Compton, *J. Am. Chem. Soc.* **1999**, *121*, 8397–8398.
- [7] F. A. Redeker, H. Beckers, S. Riedel, *RSC Adv.* **2015**, *5*, 106568–106573.
- [8] S. Riedel, T. Köchner, X. Wang, L. Andrews, *Inorg. Chem.* **2010**, *49*, 7156–7164.
- [9] T. Vent-Schmidt, F. Brosi, J. Metzger, T. Schlöder, X. Wang, L. Andrews, C. Müller, H. Beckers, S. Riedel, *Angew. Chem., Int. Ed.* **2015**, *54*, 8279–8283.
- [10] F. Brosi, T. Vent-Schmidt, S. Kieninger, T. Schlöder, H. Beckers, S. Riedel, *Chem. Eur. J.* **2015**, *21*, 16455–16462.
- [11] M. Hass, D. L. Griscom, *J. Chem. Phys.* **1969**, *51*, 5185–5186.
- [12] F. D. Chattaway, G. Hoyle, *J. Chem. Soc., Trans.* **1923**, *123*, 654–662.
- [13] B. S. Ault, L. Andrews, *J. Chem. Phys.* **1976**, *64*, 4853–4859.
- [14] M. P. Bogaard, J. Peterson, A. D. Rae, *Acta Crystallogr., Sect. B: Struct. Crystallogr. Cryst. Chem.* **1981**, *37*, 1357–1359.
- [15] R. T. Boéré, A. Wallace Cordes, R. T. Oakley, R. W. Reed, *J. Chem. Soc., Chem. Commun.* **1985**, *0*, 655–656.
- [16] T. Chivers, J. F. Richardson, N. R. M. Smith, *Inorg. Chem.* **1985**, *24*, 2453–2458.
- [17] R. T. Boere, A. W. Cordes, S. L. Craig, R. T. Oakley, R. W. Reed, *J. Am. Chem. Soc.* **1987**, *109*, 868–874.
- [18] M. Jansen, S. Strojek, *Z. Naturforsch.* **1995**, *50*, 1171–1174.
- [19] R. Brückner, H. Haller, M. Ellwanger, S. Riedel, *Chem. Eur. J.* **2012**, *18*, 5741–5747.
- [20] F. A. Redeker, H. Beckers, S. Riedel, *Chem. Commun.* **2017**, *53*, 12958–12961.
- [21] P. Voßnacker, N. Schwarze, T. Keilhack, M. Kleoff, S. Steinhauer, Y. Schiesser, M. Paven, S. Yogendra, R. Weber, S. Riedel, *ACS Sustainable Chem. Eng.* **2022**, *10*, 9525–9531.
- [22] J. C. Evans, G. Y. Lo, *J. Chem. Phys.* **1966**, *44*, 3638–3639.
- [23] J. Taraba, Z. Zak, *Inorg. Chem.* **2003**, *42*, 3591–3594.
- [24] P. Pröhm, N. Schwarze, C. Müller, S. Steinhauer, H. Beckers, S. M. Rupf, S. Riedel, *Chem. Commun.* **2021**, *57*, 4843–4846.
- [25] K. Sonnenberg, P. Pröhm, N. Schwarze, C. Müller, H. Beckers, S. Riedel, *Angew. Chem., Int. Ed.* **2018**, *57*, 9136–9140.
- [26] R. Brückner, P. Pröhm, A. Wiesner, S. Steinhauer, C. Müller, S. Riedel, *Angew. Chem., Int. Ed.* **2016**, *55*, 10904–10908.
- [27] R. Brückner, H. Haller, S. Steinhauer, C. Müller, S. Riedel, *Angew. Chem.* **2015**, *127*, 15800–15804.
- [28] R. Brückner, H. Haller, S. Steinhauer, C. Müller, S. Riedel, *Angew. Chem., Int. Ed.* **2015**, *54*, 15579–15583.
- [29] K. O. Christe, J. P. Guertin, *Inorg. Chem.* **1965**, *4*, 905–908.
- [30] K. O. Christe, J. P. Guertin, *Inorg. Chem.* **1965**, *4*, 1785–1787.
- [31] K. O. Christe, W. Sawodny, J. P. Guertin, *Inorg. Chem.* **1967**, *6*, 1159–1162.
- [32] J. H. Miller, L. Andrews, *Inorg. Chem.* **1979**, *18*, 988–992.
- [33] K. O. Christe, J. P. Guertin, *Inorg. Chem.* **1966**, *5*, 473–476.
- [34] K. O. Christe, W. Sawodny, *Z. Anorg. Allg. Chem.* **1968**, *357*, 125–133.
- [35] X. Zhang, K. Seppelt, *Z. Anorg. Allg. Chem.* **1997**, *623*, 491–500.

- [36] B. Scheibe, S. I. Ivlev, A. J. Karttunen, F. Kraus, *Eur. J. Inorg. Chem.* **2020**, 2020, 1319–1324.
- [37] K. O. Christe, W. W. Wilson, R. V. Chirakal, J. C. P. Sanders, G. J. Schrobilgen, *Inorg. Chem.* **1990**, 29, 3506–3511.
- [38] M. S. Abdelbassit, O. J. Curnow, M. K. Dixon, M. R. Waterland, *Chem. - Eur. J.* **2019**, 25, 11650–11658.
- [39] C. Walbaum, M. Richter, U. Sachs, I. Pantenburg, S. Riedel, A.-V. Mudring, G. Meyer, *Angew. Chem.* **2013**, 125, 12965–12968.
- [40] C. Walbaum, M. Richter, U. Sachs, I. Pantenburg, S. Riedel, A.-V. Mudring, G. Meyer, *Angew. Chem., Int. Ed.* **2014**, 53, 5233–5233.
- [41] C. Walbaum, Neue Poly (Inter) Halogenide Mit Kronenether-Stabilisierten Kationen, PhD Thesis, Universität zu Köln, **2009**.
- [42] M. Wolff, A. Okrut, C. Feldmann, *Inorg. Chem.* **2011**, 50, 11683–11694.
- [43] B. Scheibe, A. J. Karttunen, U. Müller, F. Kraus, *Angew. Chem., Int. Ed.* **2020**, 59, 18116–18119.
- [44] J. C. Evans, G. Y. S. Lo, *Inorg. Chem.* **1967**, 6, 1483–1486.
- [45] A. Schmittke, H. Stegemann, H. Füllbier, J. Gabrusenoks, *J. Raman Spectrosc.* **1991**, 22, 627–631.
- [46] X. Chen, M. A. Rickard, J. W. Hull, C. Zheng, A. Leugers, P. Simoncic, *Inorg. Chem.* **2010**, 49, 8684–8689.
- [47] R. Babu, G. Bhargavi, M. V. Rajasekharan, *Eur. J. Inorg. Chem.* **2015**, 2015, 4689–4698.
- [48] K. Sonnenberg, P. Pröhm, S. Steinhauer, A. Wiesner, C. Müller, S. Riedel, *Z. Anorg. Allg. Chem.* **2017**, 643, 101–105.
- [49] G. Bellucci, R. Bianchini, C. Chiappe, R. Ambrosetti, *J. Am. Chem. Soc.* **1989**, 111, 199–202.
- [50] V. Vitske, H. Herrmann, M. Enders, E. Kaifer, H.-J. Himmel, *Chem. - Eur. J.* **2012**, 18, 14108–14116.
- [51] F. B. Alhanash, N. A. Barnes, S. M. Godfrey, R. Z. Khan, R. G. Pritchard, *Polyhedron* **2013**, 65, 102–109.
- [52] H. Haller, M. Ellwanger, A. Higelin, S. Riedel, *Angew. Chem., Int. Ed.* **2011**, 50, 11528–11532.
- [53] H. Haller, M. Ellwanger, A. Higelin, S. Riedel, *Z. Anorg. Allg. Chem.* **2012**, 638, 553–558.
- [54] T. M. Beck, H. Haller, J. Streuff, S. Riedel, *Synthesis* **2014**, 46, 740–747.
- [55] H. Haller, M. Hog, F. Scholz, H. Scherer, I. Krossing, S. Riedel, *Z. Naturforsch., B: J. Chem. Sci.* **2014**, 68, 1103–1107.
- [56] H. Haller, J. Schröder, S. Riedel, *Angew. Chem., Int. Ed.* **2013**, 52, 4937–4940.
- [57] H. Haller, J. Schröder, S. Riedel, *Angew. Chem.* **2013**, 125, 5037–5040.
- [58] R. D. Chambers, W. K. Gray, G. Sandford, J. F. S. Vaughan, *J. Fluorine Chem.* **1999**, 94, 213–215.
- [59] K. O. Strømme, *Acta Chem. Scand.* **1959**, 13, 2089–2100.
- [60] R. Siepmann, H. G. von Schnering, *Z. Anorg. Allg. Chem.* **1968**, 357, 289–298.
- [61] G. B. M. Vaughan, A. J. Mora, A. N. Fitch, P. N. Gates, A. S. Muir, *J. Chem. Soc., Dalton Trans.* **1999**, 79–84.
- [62] M. C. Aragoni, M. Arca, F. A. Devillanova, M. B. Hursthouse, S. L. Huth, F. Isaia, V. Lippolis, A. Mancini, H. Ogilvie, *Inorg. Chem. Commun.* **2005**, 8, 79–82.
- [63] K. Sonnenberg, P. Pröhm, C. Müller, H. Beckers, S. Steinhauer, D. Lentz, S. Riedel, *Chem. - Eur. J.* **2018**, 24, 1072–1075.
- [64] K. N. Robertson, P. K. Bakshi, T. S. Cameron, O. Knop, *Z. Anorg. Allg. Chem.* **1997**, 623, 104–114.



- [65] K. M. Fromm, R. D. Bergougnant, A. Y. Robin, *Z. Anorg. Allg. Chem.* **2006**, *632*, 828–836.
- [66] C. W. Cunningham, G. R. Burns, V. McKee, *Inorg. Chim. Acta* **1990**, *167*, 135–137.
- [67] M. A. Bondarenko, A. S. Novikov, V. P. Fedin, M. N. Sokolov, S. A. Adonin, *J. Coord. Chem.* **2020**, *73*, 3038–3043.
- [68] M. Wolff, J. Meyer, C. Feldmann, *Angew. Chem., Int. Ed.* **2011**, *50*, 4970–4973.
- [69] M. E. Easton, A. J. Ward, T. Hudson, P. Turner, A. F. Masters, T. Maschmeyer, *Chem. Eur. J.* **2015**, *21*, 2961–2965.
- [70] T. Surles, L. A. Quarterman, H. H. Hyman, *J. Inorg. Nucl. Chem.* **1973**, *35*, 668–670.
- [71] R. Minkwitz, R. Bröchler, R. Ludwig, *Inorg. Chem.* **1997**, *36*, 4280–4283.
- [72] S. Siegel, *Acta Crystallogr.* **1956**, *9*, 493–495.
- [73] W. G. Sly, R. E. Marsh, *Acta Crystallogr.* **1957**, *10*, 378–379.
- [74] S. Siegel, *Acta Crystallogr.* **1957**, *10*, 380–380.
- [75] K. O. Christe, C. J. Schack, *Inorg. Chem.* **1970**, *9*, 1852–1858.
- [76] A. J. Edwards, G. R. Jones, *J. Chem. Soc. A* **1969**, 1936–1938.
- [77] A. I. Popov, Yu. M. Kiselev, V. F. Sukhoverkhov, N. A. Chumaevsky, O. A. Krasnyanskaya, A. T. Sadikova, *Russ. J. Inorg. Chem.* **1987**, *32*, 619–622.
- [78] S. I. Ivlev, R. V. Ostvald, F. Kraus, *Monatsh. Chem.* **2016**, *147*, 1661–1668.
- [79] S. Ivlev, A. Karttunen, R. Ostvald, F. Kraus, *Z. Anorg. Allg. Chem.* **2015**, *641*, 2593–2598.
- [80] S. Ivlev, P. Woidy, V. Sobolev, I. Gerin, R. Ostvald, F. Kraus, *Z. Anorg. Allg. Chem.* **2013**, *639*, 2846–2850.
- [81] K. O. Christe, W. W. Wilson, *Inorg. Chem.* **1989**, *28*, 3275–3277.
- [82] A. R. Mahjoub, A. Hoser, J. Fuchs, K. Seppelt, *Angew. Chem., Int. Ed.* **1989**, *28*, 1526–1527.
- [83] A. R. Mahjoub, X. Zhang, K. Seppelt, *Chem. - Eur. J.* **1995**, *1*, 261–265.
- [84] M. Möbs, T. Graubner, K. Eklund, A. J. Karttunen, F. Kraus, *Chem. - Eur. J.* **2022**, *28*, e202202466.
- [85] R. Bougon, P. Charpin, J. Soriano, *C. R. Acad. Sc. Paris, Ser. C* **1971**, *272*, 565–568.
- [86] L. Meazza, J. Martí-Rujas, G. Terraneo, C. Castiglioni, A. Milani, T. Pilati, P. Metrangolo, G. Resnati, *CrystEngComm* **2011**, *13*, 4427.
- [87] E. M. Nour, L. H. Chen, J. Laane, *J. Phys. Chem.* **1986**, *90*, 2841–2846.
- [88] G. L. Breneman, R. D. Willett, *Acta Crystallogr.* **1967**, *23*, 334–334.
- [89] F. Zobi, O. Blacque, G. Steyl, B. Spingler, R. Alberto, *Inorg. Chem.* **2009**, *48*, 4963–4970.
- [90] W. Gabes, *Cryst. Struct. Comm.* **1974**, *3*, 753–755.
- [91] C. R. Groom, I. J. Bruno, M. P. Lightfoot, S. C. Ward, *Acta Crystallogr., Sect. B: Struct. Sci., Cryst. Eng. Mater.* **2016**, *72*, 171–179.
- [92] M. Ghassemzadeh, B. Neumüller, K. Dehnicke, **2010**, DOI 10.5517/CCVJ6BW.
- [93] V. F. Sukhoverkhov, N. D. Takanova, A. A. Uskova, *Zh. Neorg. Khim.* **1976**, *21*, 2245–2249.
- [94] S. I. Ivlev, A. J. Karttunen, R. V. Ostvald, F. Kraus, *Chem. Commun.* **2016**, *52*, 12040–12043.
- [95] J. Bandemehr, S. I. Ivlev, A. J. Karttunen, F. Kraus, *Eur. J. Inorg. Chem.* **2020**, *48*, 4568–4576.
- [96] B. Schmidt, K. Sonnenberg, H. Beckers, S. Steinhauer, S. Riedel, *Angew. Chem., Int. Ed.* **2018**, *57*, 9141–9145.
- [97] J. Pelletier, J. B. Caventou, *Ann. Chim. Phys.* **1819**, 142–177.
- [98] P. H. Svensson, L. Kloo, *Chem. Rev.* **2003**, *103*, 1649–1684.
- [99] D. Naumann, A. Meurer, *J. Fluorine Chem.* **1995**, *70*, 83–84.

- [100] K. O. Christe, W. W. Wilson, G. W. Drake, M. A. Petrie, J. A. Boatz, *J. Fluorine Chem.* **1998**, *88*, 185–189.
- [101] K. O. Christe, D. Naumann, *Inorg. Chem.* **1973**, *12*, 59–62.
- [102] J. Shamir, I. Yaroslavsky, *Isr. J. Chem.* **1969**, *7*, 495–497.
- [103] A. R. Mahjoub, K. Seppelt, *Angew. Chem., Int. Ed.* **1991**, *30*, 323–324.
- [104] K. Seppelt, *Acc. Chem. Res.* **2003**, *36*, 147–153.
- [105] K. O. Christe, J. P. Guertin, W. Sawodny, *Inorg. Chem.* **1968**, *7*, 626–628.
- [106] C. J. Adams, *Inorg. Nucl. Chem. Lett.* **1974**, *10*, 831–835.
- [107] K. O. Christe, J. C. P. Sanders, G. J. Schrobilgen, W. W. Wilson, *J. Chem. Soc., Chem. Commun.* **1991**, *0*, 837–840.
- [108] A.-R. Mahjoub, K. Seppelt, *Angew. Chem., Int. Ed.* **1991**, *30*, 876–878.
- [109] K. O. Christe, W. W. Wilson, G. W. Drake, D. A. Dixon, J. A. Boatz, R. Z. Gnann, *J. Am. Chem. Soc.* **1998**, *120*, 4711–4716.
- [110] Y.-Q. Wang, Z.-M. Wang, C.-S. Liao, C.-H. Yan, *Acta Crystallogr., Sect. C: Cryst. Struct. Commun.* **1999**, *55*, 1503–1506.
- [111] G. J. Visser, A. Vos, *Acta Crystallogr.* **1964**, *17*, 1336–1337.
- [112] R. C. L. Mooney, *Z. Kristallogr. - Cryst. Mater.* **1939**, *100*, 519–529.
- [113] R. W. G. Wyckoff, *J. Am. Chem. Soc.* **1920**, *42*, 1100–1116.
- [114] C. Rømming, J. Goa, H. Colldahl, L. G. Sillén, B. Zaar, E. Diczfalusy, *Acta Chem. Scand.* **1958**, *12*, 668–677.
- [115] H. Kobayashi, R. Kato, A. Kobayashi, G. Saito, M. Tokumoto, H. Anzai, T. Ishiguro, *Chem. Lett.* **1986**, *15*, 89–92.
- [116] G. Shilov, O. Kazheva, O. D'yachenko, M. Chernov'yants, S. Simonyan, V. Gol'eva, A. Pyshev, *Russ. J. Phys. Chem.* **2002**, *76*, 1295–1301.
- [117] A. S. Romanov, M. Bochmann, *Organometallics* **2015**, *34*, 2439–2454.
- [118] J. Martí-Rujas, L. Meazza, G. K. Lim, G. Terraneo, T. Pilati, K. D. M. Harris, P. Metrangolo, G. Resnati, *Angew. Chem., Int. Ed.* **2013**, *52*, 13444–13448.
- [119] T. Ejima, J. L. de Boer, A. Vos, *Acta Crystallogr.* **1963**, *16*, 243–247.
- [120] B. Burgenmeister, K. Sonnenberg, S. Riedel, I. Krossing, *Chem. - Eur. J.* **2017**, *23*, 11312–11322.
- [121] D. Hausmann, A. Eich, C. Feldmann, *J. Mol. Struct.* **2018**, *1166*, 159–163.
- [122] C. L. R. Mooney, *Z. Kristallogr. - Cryst. Mater.* **1938**, *98*, 324–333.
- [123] T. J. Emge, H. H. Wang, P. C. W. Leung, P. R. Rust, J. D. Cook, P. L. Jackson, K. Douglas. Carlson, J. M. Williams, M. Hwan. Whangbo, *J. Am. Chem. Soc.* **1986**, *108*, 695–702.
- [124] P. C. W. Leung, T. J. Emge, A. J. Schultz, M. A. Beno, K. D. Carlson, H. H. Wang, M. A. Firestone, J. M. Williams, *Solid State Commun.* **1986**, *57*, 93–97.
- [125] E. Laukhina, J. Vidal-Gancedo, S. Khasanov, V. Tkacheva, L. Zorina, R. Shibaeva, J. Singleton, R. Wojciechowski, J. Ulanski, V. Laukhin, J. Veciana, C. Rovira, *Adv. Mater.* **2000**, *12*, 1205–1210.
- [126] E. Laukhina, J. Vidal-Gancedo, V. Laukhin, J. Veciana, I. Chuev, V. Tkacheva, K. Wurst, C. Rovira, *J. Am. Chem. Soc.* **2003**, *125*, 3948–3953.
- [127] M. Watanabe, Y. Noda, H. Taniguchi, *J. Low Temp. Phys.* **2006**, *142*, 163–166.
- [128] Y. Yagi, A. I. Popov, *J. Inorg. Nucl. Chem.* **1967**, *29*, 2223–2230.
- [129] M. S. Abdelbassit, O. J. Curnow, *Chem. - Eur. J.* **2019**, *25*, 13294–13298.
- [130] H. Endres, M. Hiller, H. J. Keller, *Z. Naturforsch. B* **1985**, *40*, 1664–1671.
- [131] A. Parlow, H. Hartl, *Z. Naturforsch. B* **1985**, *40*, 45–52.
- [132] S. Soled, G. B. Carpenter, *Acta Crystallogr., Sect. B: Struct. Crystallogr. Cryst. Chem.* **1973**, *29*, 2556–2559.
- [133] J. E. Davies, E. K. Nunn, *J. Chem. Soc. D* **1969**, 1374a.

- [134] D. Hausmann, R. Köppe, S. Wolf, P. W. Roesky, C. Feldmann, *Dalton Trans.* **2016**, 45, 16526–16532.
- [135] T. J. Emge, H. H. Wang, M. A. Beno, P. C. W. Leung, M. A. Firestone, H. C. Jenkins, J. D. Cook, J. M. Williams, E. L. Venturini, *Inorg. Chem.* **1985**, 24, 1736–1738.
- [136] H. Kobayashi, R. Kato, A. Kobayashi, G. Saito, M. Tokumoto, H. Anzai, T. Ishiguro, *Chem. Lett.* **1985**, 14, 1293–1296.
- [137] O. N. Kazheva, G. G. Aleksandrov, O. A. D'yachenko, M. S. Chernov'yants, S. S. Simonyan, E. O. Lykova, *Russ. J. Coord. Chem.* **2003**, 29, 819–827.
- [138] I.-E. Parigoridi, G. J. Corban, S. K. Hadjikakou, N. Hadjiliadis, N. Kourkoumelis, G. Kostakis, V. Psycharis, C. P. Raptopoulou, M. Kubicki, *Dalton Trans.* **2008**, 5159.
- [139] L. Mann, Investigation of Polybromides, Non-Classical Polyinterhalides Based on ICl and IBr, and Fluorinated [PPN]<sup>+</sup>-Salts, PhD thesis, Freie Universität Berlin, **2018**.
- [140] M. S. Abdelbassit, O. J. Curnow, M. K. Dixon, M. R. Waterland, *Chem. - Eur. J.* **2019**, 25, 11659–11669.
- [141] K. O. Christe, *Inorg. Chem.* **1972**, 11, 1215–1219.
- [142] J. Cornog, E. E. Bauer, *J. Am. Chem. Soc.* **1942**, 64, 2620–2624.
- [143] Y. Yagi, A. I. Popov, *Inorg. Nucl. Chem. Lett.* **1965**, 1, 21–24.
- [144] A. Parlow, H. Hartl, *Acta Crystallogr. B, Struct. Crystallogr. Cryst. Chem.* **1979**, 35, 1930–1933.
- [145] L. Mann, *Master Thesis*, Albert-Ludwigs Universität, Freiburg, **2013**.
- [146] K. Sonnenberg, L. Mann, F. A. Redeker, B. Schmidt, S. Riedel, *Angew. Chem., Int. Ed.* **2020**, 59, 5464–5493.
- [147] L. Mann, P. Voßnacker, C. Müller, S. Riedel, *Chem. Eur. J.* **2017**, 23, 244–249.
- [148] R. Minkwitz, M. Berkei, R. Ludwig, *Inorg. Chem.* **2001**, 40, 25–28.
- [149] M. C. Aragoni, M. Arca, F. A. Devillanova, M. B. Hursthouse, S. L. Huth, F. Isaia, V. Lippolis, A. Mancini, G. Verani, *Eur. J. Inorg. Chem.* **2008**, 2008, 3921–3928.
- [150] G. A. Olah, M. B. Comisarow, *J. Am. Chem. Soc.* **1968**, 90, 5033–5034.
- [151] S. K. Bramble, P. A. Hamilton, *J. Chem. Soc., Faraday Trans.* **1990**, 86, 2009–2013.
- [152] F. Cacace, G. de Petris, F. Pepi, M. Rosi, A. Sgamellotti, *Rapid Commun. Mass Spectrom.* **1998**, 12, 1911–1913.
- [153] R. Minkwitz, J. Nowicki, H. Härtner, W. Sawodny, *Spectrochim. Acta, Part A* **1991**, 47, 1673–1676.
- [154] S. Seidel, K. Seppelt, *Angew. Chem., Int. Ed.* **2000**, 39, 3923–3925.
- [155] K. O. Christe, W. Sawodny, *Inorg. Chem.* **1967**, 6, 313–318.
- [156] R. J. Gillespie, M. J. Morton, *Inorg. Chem.* **1970**, 9, 616–618.
- [157] H. Lynton, J. Passmore, *Can. J. Chem.* **1971**, 49, 2539–2543.
- [158] B. Scheibe, R. Haiges, S. I. Ivlev, A. J. Karttunen, U. Müller, K. O. Christe, F. Kraus, *Eur. J. Inorg. Chem.* **2020**, 2020, 4483–4496.
- [159] G. Frenking, W. Koch, *Inorg. Chem.* **1990**, 29, 4513–4517.
- [160] K. O. Christe, R. D. Wilson, *Inorg. Nucl. Chem. Lett.* **1973**, 9, 845–847.
- [161] K. O. Christe, X. Zhang, J. A. Sheehy, R. Bau, *J. Am. Chem. Soc.* **2001**, 123, 6338–6348.
- [162] W. W. Wilson, K. O. Christe, *J. Fluorine Chem.* **1982**, 21, 7.
- [163] K. O. Christe, *Inorg. Chem.* **1973**, 12, 1580–1587.
- [164] K. O. Christe, W. W. Wilson, E. C. Curtis, *Inorg. Chem.* **1983**, 22, 3056–3060.
- [165] R. J. Gillespie, M. J. Morton, *Inorg. Chem.* **1972**, 11, 586–591.
- [166] W. W. Wilson, R. C. Thompson, F. Aubke, *Inorg. Chem.* **1980**, 19, 1489–1493.
- [167] K. O. Christe, R. Bau, D. Zhao, *Z. Anorg. Allg. Chem.* **1991**, 593, 46–60.
- [168] K. O. Christe, D. A. Dixon, R. Minkwitz, *Z. Anorg. Allg. Chem.* **1992**, 612, 51–55.
- [169] K. O. Christe, C. J. Schack, *Inorg. Chem.* **1970**, 9, 2296–2299.
- [170] H. A. Carter, F. Aubke, *Can. J. Chem.* **1970**, 48, 3456–3459.

- [171] A. Vij, F. S. Tham, V. Vij, W. W. Wilson, K. O. Christe, *Inorg. Chem.* **2002**, *41*, 6397–6403.
- [172] M. D. Lind, K. O. Christe, *Inorg. Chem.* **1972**, *11*, 608–612.
- [173] R. J. Gillespie, G. J. Schrobilgen, *Inorg. Chem.* **1974**, *13*, 1230–1235.
- [174] S. I. Ivlev, A. J. Karttunen, M. R. Buchner, M. Conrad, F. Kraus, *Angew. Chem., Int. Ed.* **2018**, *57*, 14640–14644.
- [175] R. J. Gillespie, M. J. Morton, *J. Mol. Spectrosc.* **1969**, *30*, 178–183.
- [176] R. J. Gillespie, J. B. Milne, *Inorg. Chem.* **1966**, *5*, 1577–1582.
- [177] C. Chung, G. H. Cady, *Inorg. Chem.* **1972**, *11*, 2528–2531.
- [178] R. Faggiani, R. J. Gillespie, R. Kapoor, C. J. L. Lock, J. E. Vekris, *Inorg. Chem.* **1988**, *27*, 4350–4355.
- [179] M. Müller, M. Albrecht, V. Gossen, T. Peters, A. Hoffmann, G. Raabe, A. Valkonen, K. Rissanen, *Chem. Eur. J.* **2010**, *16*, 12446–12453.
- [180] J. Passmore, P. Taylor, T. Whidden, P. S. White, *Can. J. Chem.* **1979**, *57*, 968–973.
- [181] S. Hoyer, Strukturchemie von Iodverbindungen in den Oxidationsstufen +1/7 bis +5, Dissertation, Freie Universität Berlin, **2004**.
- [182] Thomas. Birchall, R. D. Myers, *Inorg. Chem.* **1981**, *20*, 2207–2211.
- [183] J. Shamir, R. Rafaeloff, *Spectrochim. Acta, Part A* **1973**, *29*, 873–878.
- [184] J. Shamir, M. Lustig, *Inorg. Chem.* **1973**, *12*, 1108–1112.
- [185] T. Birchall, R. D. Myers, *Inorg. Chem.* **1983**, *22*, 1751–1756.
- [186] Thomas. Birchall, R. D. Myers, *Inorg. Chem.* **1982**, *21*, 213–217.
- [187] W. W. Wilson, F. Aubke, *Inorg. Chem.* **1974**, *13*, 326–332.
- [188] K. O. Christe, W. Sawodny, *Inorg. Chem.* **1967**, *6*, 1783–1788.
- [189] W. W. Wilson, K. O. Christe, *Inorg. Chem.* **1989**, *28*, 4172–4175.
- [190] K. O. Christe, W. W. Wilson, R. D. Wilson, R. Bau, J. A. Feng, *J. Am. Chem. Soc.* **1990**, *112*, 7619–7625.
- [191] *APEX3 V2019.11-2*, Bruker AXS Inc., Madison, Wisconsin, USA, **2019**.
- [192] G. M. Sheldrick, *Acta Crystallogr.* **2015**, *A71*, 3–8.
- [193] G. M. Sheldrick, *Acta Crystallogr.* **2015**, *C71*, 3–8.
- [194] C. B. Hübschle, G. M. Sheldrick, B. Dittrich, *J. Appl. Crystallogr.* **2011**, *44*, 1281–1284.
- [195] S. I. Ivlev, M. Conrad, F. Kraus, *Z. Kristallogr. - Cryst. Mater.* **2019**, *234*, 415–418.
- [196] K. Brandenburg, H. Putz, *Diamond - Crystal and Molecular Structure Visualization, V 4.6.8*, Crystal Impact GbR, Bonn, **2022**.
- [197] G. Beata, G. Perego, B. Civalleri, *J. Comput. Chem.* **2019**, *40*, 2329–2338.
- [198] “CRYSPLOT - A modern and easy to use visualization environment for plotting properties of crystalline solids as computed by means of the CRYSTAL code.,” can be found under <http://crysplot.crystalsolutions.eu/index.html>, **2022**.
- [199] G. Kabisch, M. Klose, *J. Raman Spectrosc.* **1978**, *7*, 311–315.
- [200] R. Ahlrichs, M. Bär, M. Häser, H. Horn, C. Kölmel, *Chem. Phys. Lett.* **1989**, *162*, 165–169.
- [201] *TURBOMOLE V7.7, a Development of University of Karlsruhe and Forschungszentrum Karlsruhe GmbH, 1989-2007, TURBOMOLE GmbH, since 2007.*, **2022**.
- [202] C. Adamo, V. Barone, *J. Chem. Phys.* **1999**, *110*, 6158–6170.
- [203] J. P. Perdew, K. Burke, M. Ernzerhof, *Phys. Rev. Lett.* **1996**, *77*, 3865–3868.
- [204] F. Weigend, R. Ahlrichs, *Phys. Chem. Chem. Phys.* **2005**, *7*, 3297–3305.
- [205] K. A. Peterson, D. Figgen, E. Goll, H. Stoll, M. Dolg, *J. Chem. Phys.* **2003**, *119*, 11113–11123.
- [206] F. Weigend, *Phys. Chem. Chem. Phys.* **2002**, *4*, 4285–4291.
- [207] K. Eichkorn, O. Treutler, H. Öhm, M. Häser, R. Ahlrichs, *Chem. Phys. Lett.* **1995**, *240*, 283–290.
- [208] M. Sierka, A. Hogekamp, R. Ahlrichs, *J. Chem. Phys.* **2003**, *118*, 9136–9148.

- [209] A. Klamt, G. Schürmann, *J. Chem. Soc., Perkin Trans. 2* **1993**, 799–805.
- [210] G. Knizia, *J. Chem. Theory Comput.* **2013**, 9, 4834–4843.
- [211] A. Erba, J. K. Desmarais, S. Casassa, B. Civalleri, L. Donà, I. J. Bush, B. Searle, L. Maschio, L. Edith-Daga, A. Cossard, C. Ribaldone, E. Ascrizzi, N. L. Marana, J.-P. Flament, B. Kirtman, *J. Chem. Theory Comput.* **2023**, 19, 6891–6932.
- [212] S. I. Ivlev, K. Gaul, M. Chen, A. J. Karttunen, R. Berger, F. Kraus, *Chem. - Eur. J.* **2019**, 25, 5793–5802.
- [213] A. J. Karttunen, T. Tynell, M. Karppinen, *J. Phys. Chem. C* **2015**, 119, 13105–13114.
- [214] S. S. Rudel, T. Graubner, A. J. Karttunen, F. Kraus, *Z. Anorg. Allg. Chem.* **2020**, 646, 1396–1402.
- [215] S. Grimme, J. Antony, S. Ehrlich, H. Krieg, *J. Chem. Phys.* **2010**, 132, 154104.
- [216] S. Grimme, A. Hansen, J. G. Brandenburg, C. Bannwarth, *Chem. Rev.* **2016**, 116, 5105–5154.
- [217] H. J. Monkhorst, J. D. Pack, *Phys. Rev. B* **1976**, 13, 5188–5192.
- [218] L. Maschio, B. Kirtman, M. Rérat, R. Orlando, R. Dovesi, *J. Chem. Phys.* **2013**, 139, 164102.
- [219] C. M. Zicovich-Wilson, F. Pascale, C. Roetti, V. R. Saunders, R. Orlando, R. Dovesi, *J. Comput. Chem.* **2004**, 25, 1873–1881.
- [220] F. Pascale, C. M. Zicovich-Wilson, F. López Gejo, B. Civalleri, R. Orlando, R. Dovesi, *J. Comput. Chem.* **2004**, 25, 888–897.
